# Supplementary material for: Structural identification ofin vitrometabolites for 23-nordeoxycholic acid by structural analogue matching
Source: Royal Society of Chemistry journal article supplement (doi:10.1039/d3ay00313b), 2023-01-01
Supplement: d3ay00313b1.pdf [file d3ay00313b1.pdf]

1 **Supporting information for**  
2  
3 **Structural identification of in vitro metabolites for 23-**  
4 **nordeoxycholic acid by structural analogue matching**

5  
6 Yan Cao,<sup>a,b</sup> Xiaoya Niu,<sup>a,b</sup> Wenzheng Li,<sup>a,b</sup> Wei Chen,<sup>a,b</sup> Luyao Ren,<sup>a,b</sup> Zheng Cao,<sup>c</sup>  
7 Jun Li <sup>a,b,\*</sup> and Yuelin Song <sup>a\*</sup>

8 <sup>a</sup> Modern Research Center for Traditional Chinese Medicine, Beijing Research  
9 Institute of Chinese Medicine, Beijing University of Chinese Medicine, Beijing  
10 100029, China;

11 <sup>b</sup> School of Chinese Materia Medica, Beijing University of Chinese Medicine, Beijing  
12 100029, China;

13 <sup>c</sup> Center of Clinical Mass Spectrometry, Beijing Obstetrics and Gynecology Hospital,  
14 Beijing Maternal and Child Health Care Hospital, Capital Medical University,  
15 Beijing 100026, China.

16

17 \* Corresponding Authors

18 Prof. Jun Li, E-mail: [drlj666@163.com](mailto:drlj666@163.com)

19 Prof. Yuelin Song, E-mail: [syltwc2005@163.com](mailto:syltwc2005@163.com)

20

21 **Supplementary data includes the following items:**

|                       |                                                                                                                                                                                          |
|-----------------------|------------------------------------------------------------------------------------------------------------------------------------------------------------------------------------------|
| <b>P<sub>S2</sub></b> | <b>Table S1.</b> The predefined metabolic pathways, ion transitions, and compound-dependent mass parameters of all targeted analytes.                                                    |
| <b>P<sub>S3</sub></b> | <b>Fig. S1</b> MS/MS spectrum (A) and proposed fragmentation pathways (B) of norDCA in the negative ion mode.                                                                            |
| <b>P<sub>S4</sub></b> | <b>Fig. S2</b> MS/MS spectrum (A) and proposed fragmentation pathways (B) of norDCA in the positive ion mode.                                                                            |
| <b>P<sub>S5</sub></b> | <b>Fig. S3</b> MS <sup>2</sup> spectrum comparison between deprotonated molecular ions of norCA (A, $m/z$ 393.3 [M-H] <sup>-</sup> ) and CA (B, $m/z$ 407.3 [M-H] <sup>-</sup> ).        |
| <b>P<sub>S6</sub></b> | <b>Fig. S4</b> Representative LC-MRM chromatograms for incubation of norDCA with HLMs (A), with MLMs (B), with RLMs (C), without protein (D), and without NADPH-regenerating system (E). |
| <b>P<sub>S7</sub></b> | <b>Fig. S5</b> Representative LC-MRM chromatograms for incubation of norDCA with HLMs and PAPS, with human recombinant SULT2A1 and PAPS, and without protein. without PAPS.              |
| <b>P<sub>S7</sub></b> | <b>Fig. S6</b> Representative LC-MRM chromatograms for incubation of norDCA with HLMs and UDPGA, without protein, and without UDPGA.                                                     |

23 **Table S1 The predefined metabolic pathways, ion transitions, and compound-dependent**  
 24 **mass parameters of all possible metabolites.**

| Metabolic type  | Q1    | Q3    | CE (eV) | DP (V) |
|-----------------|-------|-------|---------|--------|
| Parent compound | 377.3 | 377.3 | -20     | -120   |
| Oxidation       | 375.3 | 375.3 | -20     | -120   |
| Oxidation       | 373.3 | 373.3 | -20     | -120   |
| Hydroxylation   | 393.3 | 393.3 | -20     | -120   |
| Oxidation       | 391.3 | 391.3 | -20     | -120   |
| Oxidation       | 389.3 | 389.3 | -20     | -120   |
| Sulfation       | 457.3 | 96.9  | -120    | -120   |
| Glucuronidation | 553.3 | 377.3 | -50     | -120   |

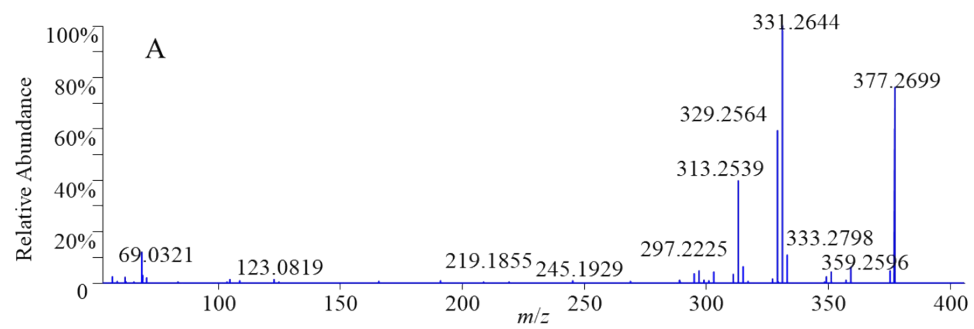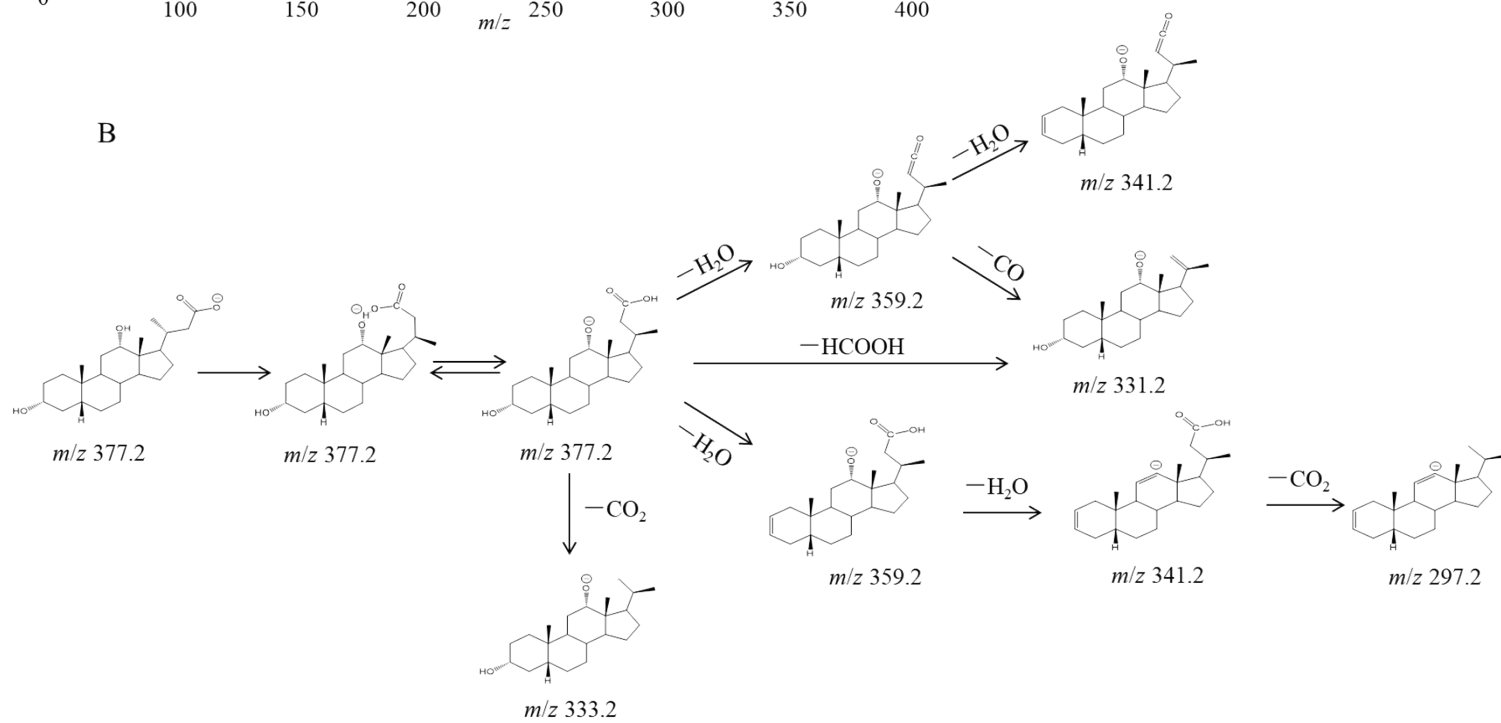

26  
27 **Fig. S1**

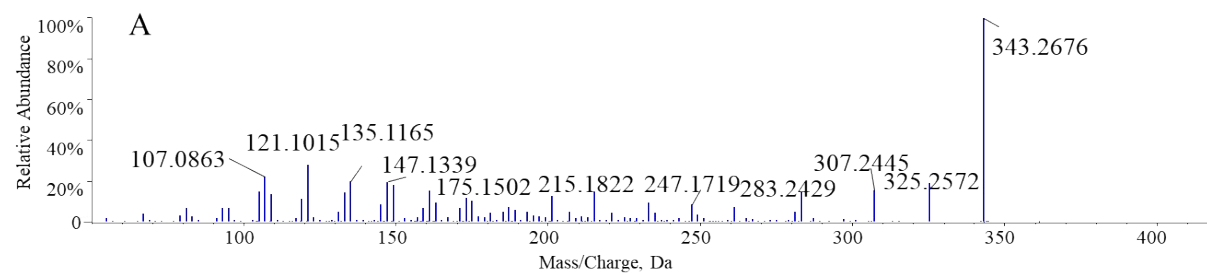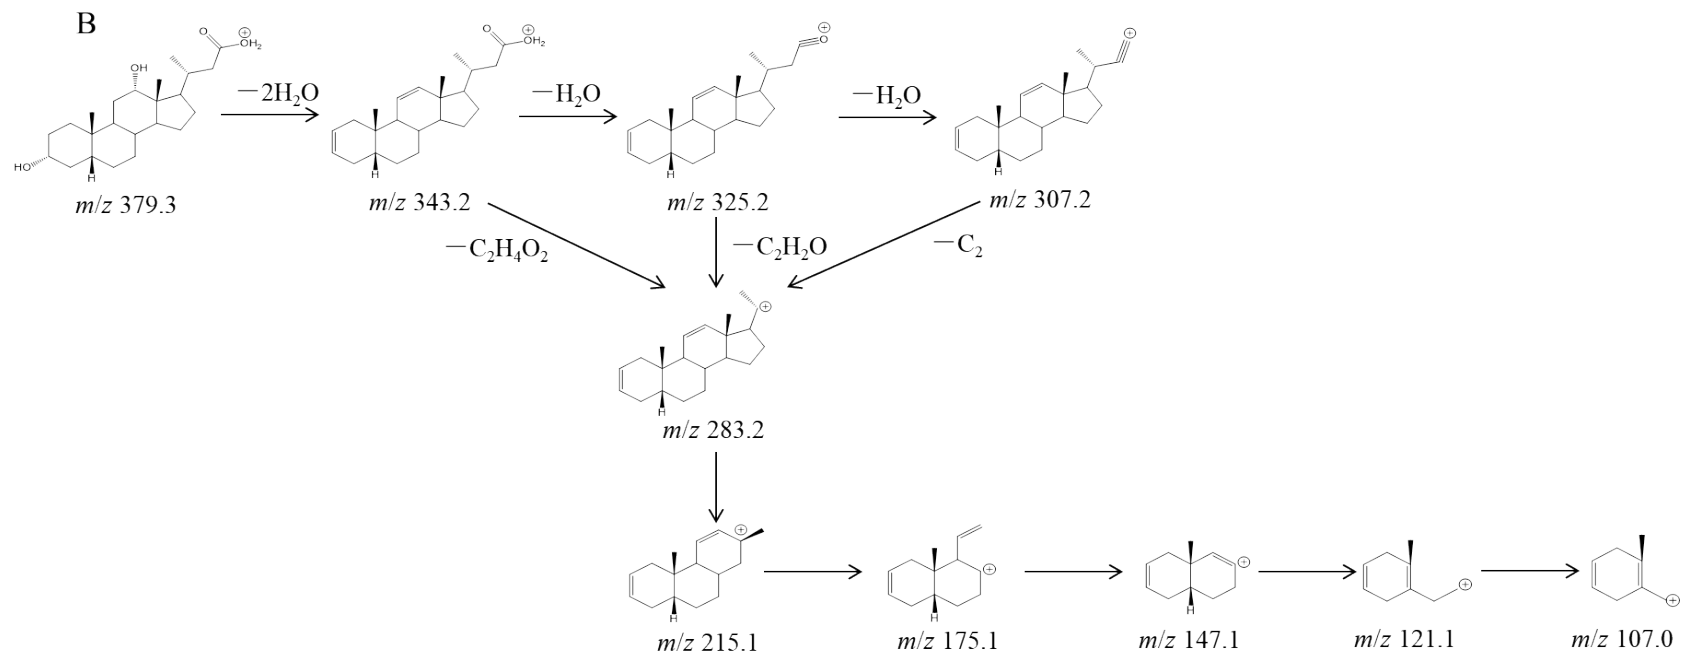

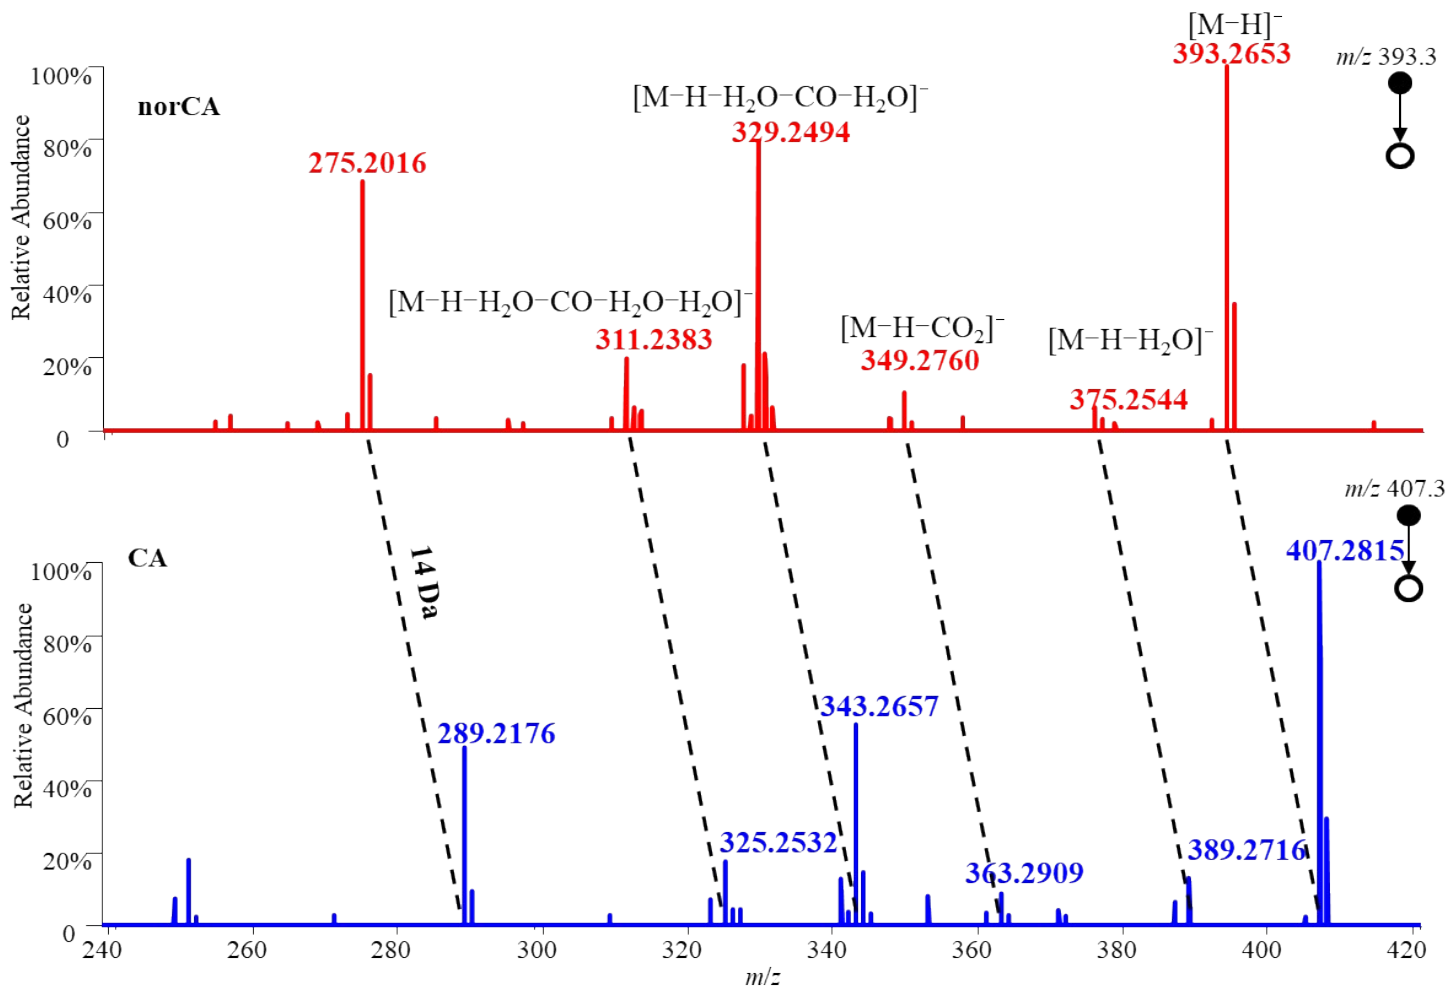

31

32 **Fig. S3**

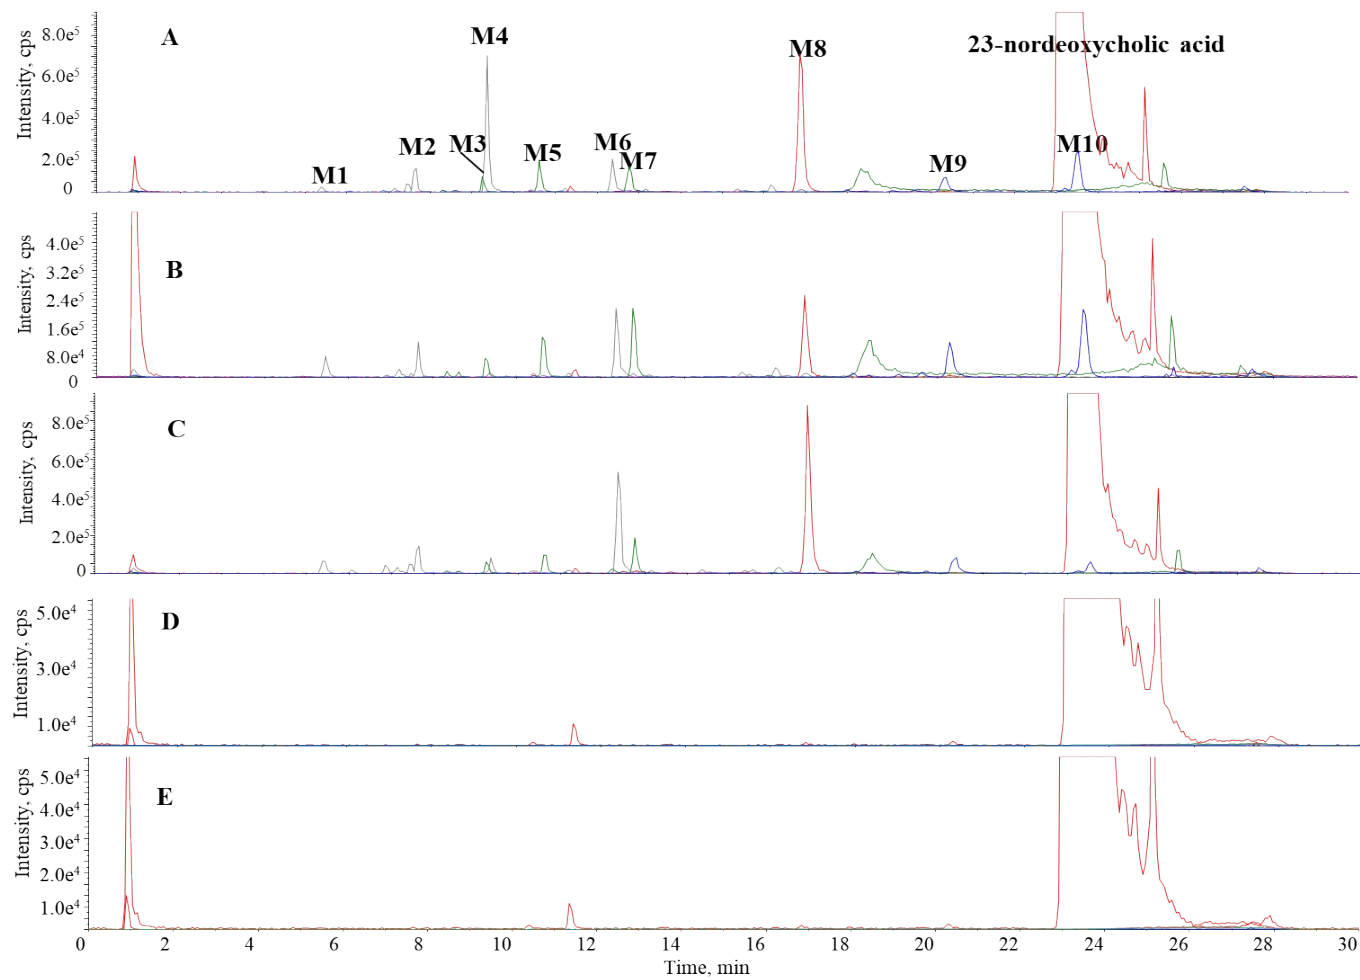

36

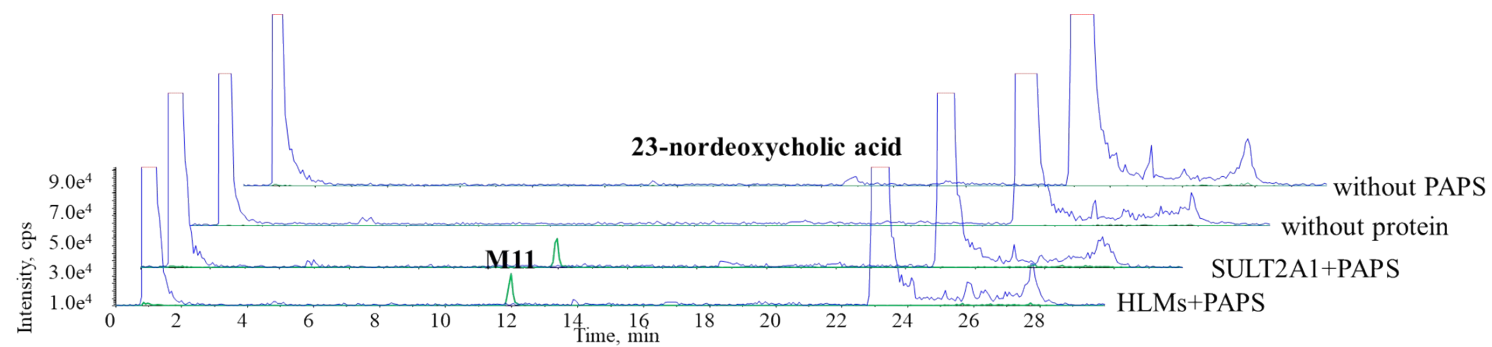

37

38 **Fig. S5**

39

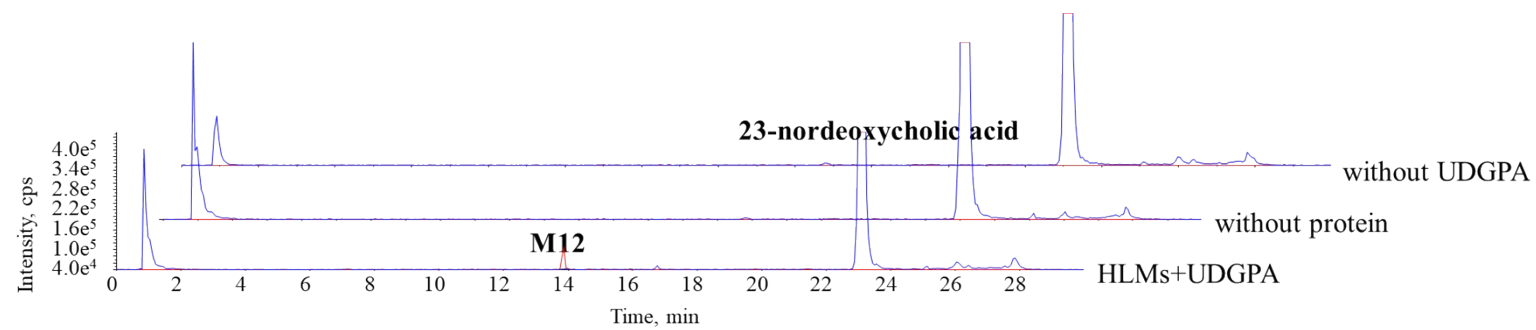

40

41 **Fig. S6**

42
